# Supplementary material for: Simultaneous amplification of DNA in a multiplex circular array shaped continuous flow PCR microfluidic chip for on-site detection of bacterial
Source: Royal Society of Chemistry journal article supplement (doi:10.1039/d3lc00274h), 2023-01-01
Supplement: d3lc00274h1.pdf [file d3lc00274h1.pdf]

# Simultaneous Amplification of DNA in a Multiplex Circular Array Shaped Continuous Flow PCR Microfluidic Chip for On-site Detection of Bacterial

Bo Yang<sup>a</sup>, Ping Wang<sup>b</sup>, Zhenqing Li<sup>\*, a</sup>, Qingxiang You<sup>a</sup>, Shinichi Sekine<sup>c</sup>, Junshan Ma<sup>a</sup>, Songlin Zhuang<sup>a</sup>, Dawei Zhang<sup>\*, a</sup>, Yoshinori Yamaguchi<sup>\*, d</sup>

<sup>a</sup> Engineering Research Center of Optical Instrument and System, Ministry of Education, Shanghai Key Lab of Modern Optical System, University of Shanghai for Science and Technology, Shanghai, China

<sup>b</sup> Department of Clinical Laboratory, Xinhua Hospital, Shanghai Jiao Tong University School of Medicine, 1665 Kongjiang Road, Shanghai 200092, China

<sup>c</sup> Department of Preventive Dentistry, Graduate School of Dentistry, Osaka University, Osaka, Japan

<sup>d</sup> Oono Joint Research laboratory, Graduate school of Engineering, Osaka University, Osaka 565-0871, Japan

## Corresponding authors

Zhenqing Li, [zhenqingli@163.com](mailto:zhenqingli@163.com);

Dawei Zhang, [dwzhang@usst.edu.cn](mailto:dwzhang@usst.edu.cn);

Yoshinori Yamaguchi, [yoshi.yamaguchi@ap.eng.osaka-u.ac.jp](mailto:yoshi.yamaguchi@ap.eng.osaka-u.ac.jp)

## Experimental section

### **Capillary electrophoresis system**

All the PCR products were validated in a self-built capillary electrophoresis (CE) system, which has been detailed described in Ref<sup>1, 2</sup>. In brief, it was composed of a confocal optical system, a MODEL 610E high voltage power supply (TREK, USA), and a photomultiplier (PMT) (R928, Hamamatsu photonics, Japan). The confocal optical system was based on a BX51 epi-illumination microscope (Olympus, Japan). The light centered at 490 nm was achieved from a mercury lamp. Then it passed through the mixture of DNA and SYBR Green I in the capillary. The fluorescence from the mixture was collected by a PMT. NI-USB-6212 card (National Instrument, USA) and a self-built LabVIEW software were used for input signal generation and output signal detection. The total length and the effective length of the capillary (Ruifeng Chromatography Ltd., Handan, China) were 12 cm and 8 cm, respectively. The samples were electrokinetically introduced into the capillary. The capillary was cleaned by deionized water after each run. All the separations were performed in dark house at room temperature.

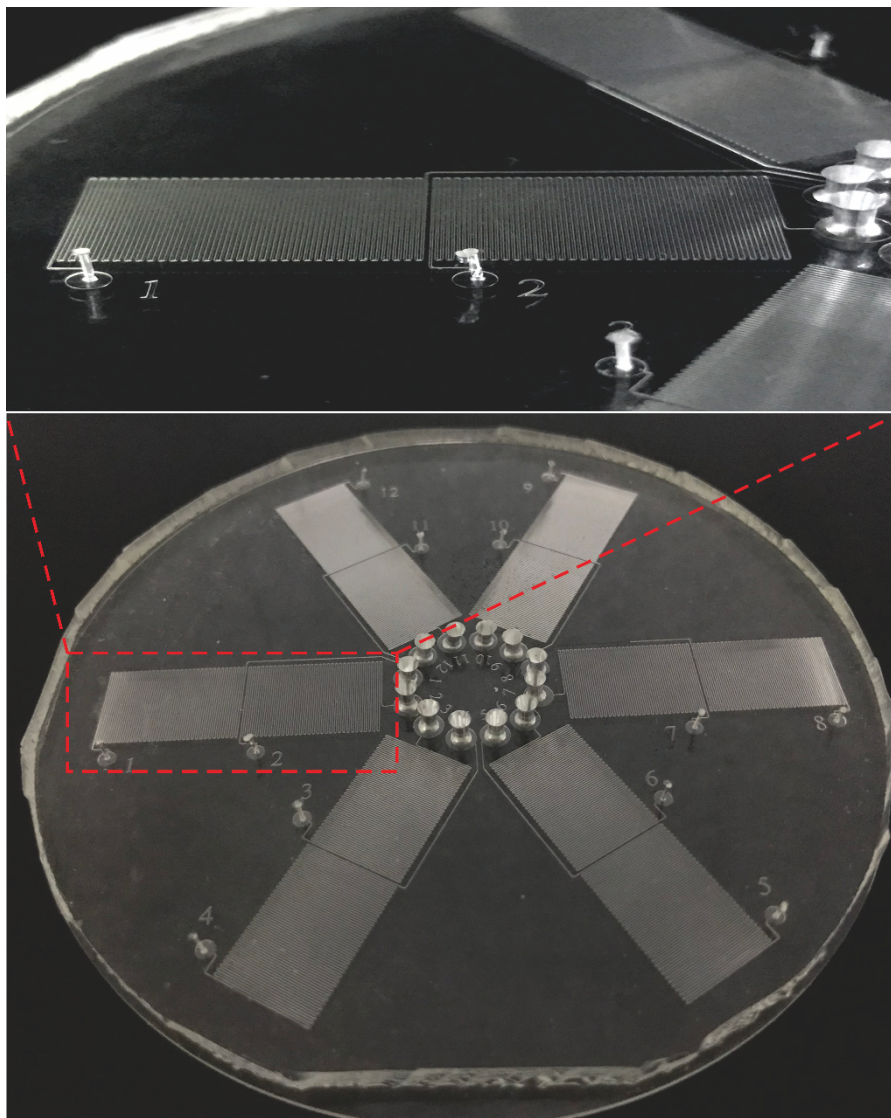

**Fig.S1** The photo of the high throughput CF-PCR microfluidic chip.

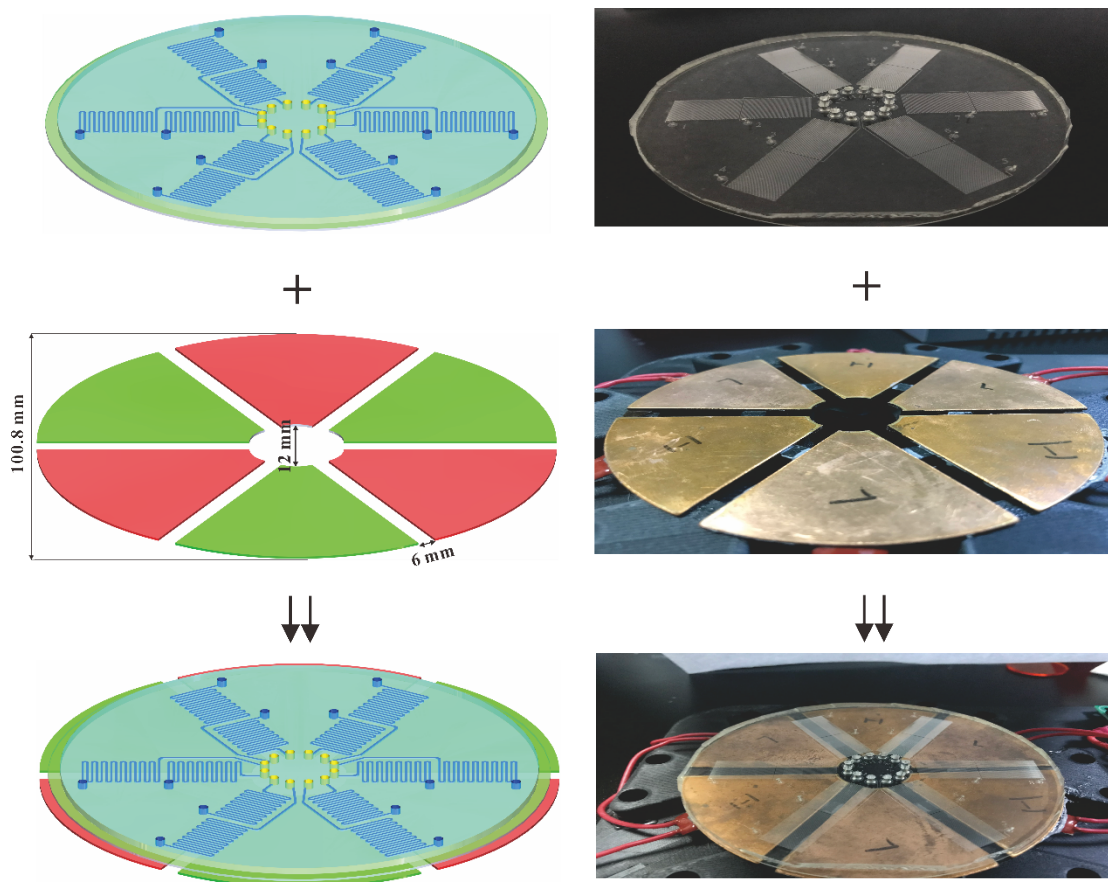

**Fig.S2** The left side showed a schematic diagram of the heating block, PDMS-glass chip, and chip system. There was a corresponding physical picture on the right side.

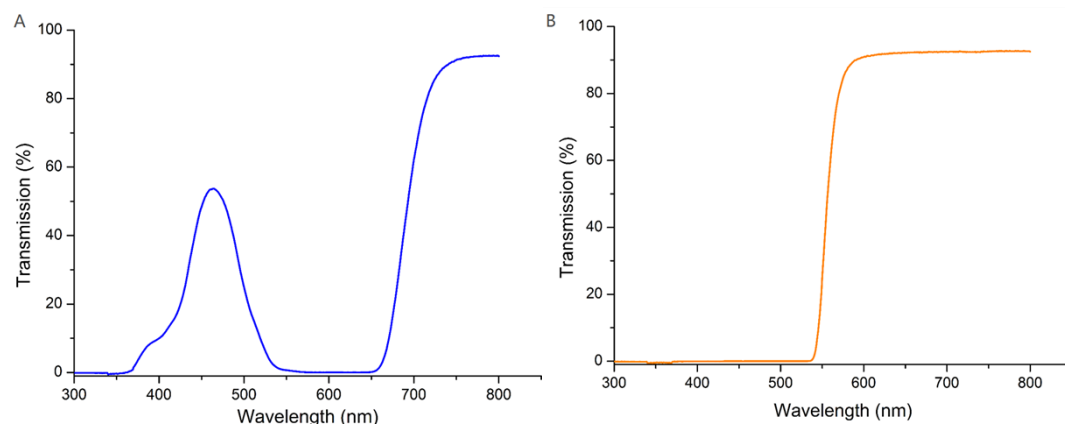

**Fig.S3** (A) The transmission rate of the plastic excitation filter above the LED array. (B) The transmission rate of the plastic emission filter below the CMOS.

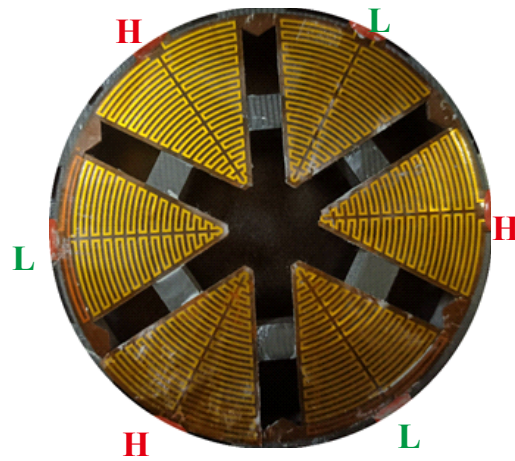

**Fig.S4** This is the Pi heating film. The six wedge-shaped areas were divided into two groups to provide different temperatures. The resistance of the metal heating wire in each wedge was  $46 \pm 0.2 \Omega$ , and the working voltage was 12 V. Silver silicone grease will be added in the middle of the heating film and the copper block to improve the thermal conductivity.

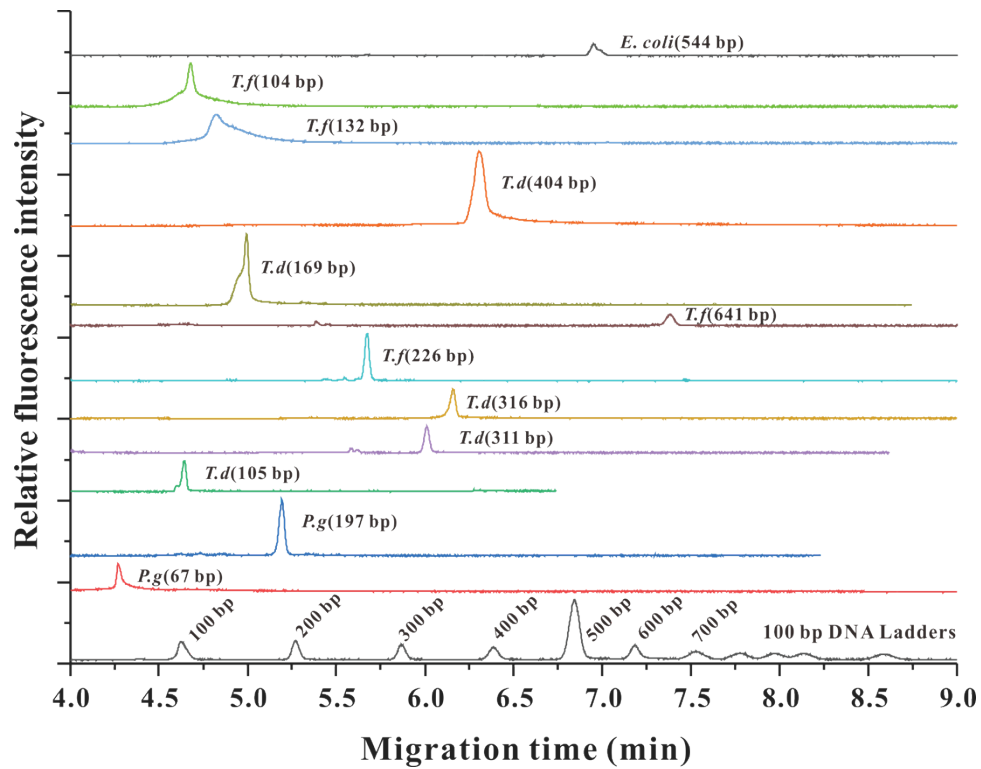

**Fig.S5** Capillary electrophoresis of 100 bp DNA Ladders and the reaction solution of the microchip collecting tanks under the same electrophoretic conditions. Electrophoretic conditions:  $100 \text{ V}\cdot\text{cm}^{-1}$  of electric field strength, 0.5% HEC (1300k) as sieving matrix, effective length of the capillary quartz tube: 8 cm; total length of the capillary quartz tube: 12 cm. The minor migration time shift was possibly caused by the little position shift of the capillary.

**Table.S1** The primers of *Porphyromonas gingivalis*, *Treponema denticola*, *Tannerella forsythia* and *Escherichia coli*

| Primers     | The nucleotide sequence (5'---3') | Amplicons | Bacteria                                       |                                                |
|-------------|-----------------------------------|-----------|------------------------------------------------|------------------------------------------------|
| PG197-F     | TGTAGATGACTGATGGTGAAAACC          | 197 bp    | <i>Porphyromonas gingivalis</i> <sup>3-6</sup> |                                                |
| PG197-R     | ACGTCATCCCCACCTTCCTC              |           |                                                |                                                |
| PG67-F      | GCGCTCAACGTTAGCC                  | 67 bp     |                                                |                                                |
| PG67-R      | CACGAATTCGCCTGC                   |           |                                                |                                                |
| PG169-F     | TGACCTTAAGCCTGTAG                 | 169 bp    |                                                |                                                |
| PG169-R     | TCATCTCGTGCCGATCACT               |           |                                                |                                                |
| PG404-F     | AGGCAGCTTGCCATACTGCG              | 404 bp    |                                                |                                                |
| PG404-R     | ACTGTTAGCAACTACCGATGT             |           |                                                |                                                |
| TD311-F     | AAGGCGGTAGAGCCGCTCA               | 311 bp    |                                                |                                                |
| TD311-R     | AGCCGCTGTCGAAAAGCCCA              |           |                                                |                                                |
| TD316-F     | TAATACCGAATGTGCTCATTTACAT         | 316 bp    |                                                | <i>Treponema denticola</i> <sup>3, 5, 7</sup>  |
| TD316-R     | TCAAAGAAGCATTCCCTCTTCTCTTA        |           |                                                |                                                |
| TD105-F     | AGAGCAAGCTCTCCCTTACCGT            | 105 bp    |                                                |                                                |
| TD105-R     | TAAGGGCGGCTTGAAATAATGA            |           |                                                |                                                |
| TF641-F     | GCGTATGTAACCTGCCCGCA              | 641 bp    |                                                |                                                |
| TF641-R     | TGCTTCAGTGTGAGTTATACCT            |           |                                                |                                                |
| TF226-F     | ATCCTGGCTCAGGATGAACG              | 226 bp    |                                                | <i>Tannerella forsythia</i> <sup>3, 8-10</sup> |
| TF226-R     | TACGCATACCCATCCGCAA               |           |                                                |                                                |
| TF132-F     | TCACTATTGTGTCTCGCTG               | 132 bp    |                                                |                                                |
| TF132-R     | TCTCTCCGATTGTGGTTA                |           |                                                |                                                |
| TF104-F     | GACAACCGGATCAGCGAAAT              | 104 bp    |                                                |                                                |
| TF104-R     | TCATTGACTTGCGGATCG                |           |                                                |                                                |
| E.coli544-F | GGAAGAAGCTTGCTTCTTTGCTGAC         | 544 bp    | <i>Escherichia coli</i> <sup>11</sup>          |                                                |
| E.coli544-R | AGCCCGGGGATTCACATCTGACTTA         |           |                                                |                                                |



**Table.S2** The time consumption for the volume of solution collection in the collection tank and DNA amplification in the channel

| Inner-ring channels |                   |                    |                   |                    |                   |                    |                   |                    |                   |                    |
|---------------------|-------------------|--------------------|-------------------|--------------------|-------------------|--------------------|-------------------|--------------------|-------------------|--------------------|
| Flow rate           | 0.1 mL/hr         |                    | 0.25 mL/hr        |                    | 0.5 mL/hr         |                    | 0.75 mL/hr        |                    | 1 mL/hr           |                    |
| Volume              | Average Time(min) | Standard Deviation |
| 0                   | 12.55             | 0.39               | 9.23              | 0.27               | 7.65              | 0.07               | 6.85              | 0.13               | 5.26              | 0.11               |
| 5                   | 21.71             | 0.82               | 17.38             | 0.46               | 14.39             | 0.84               | 12.17             | 0.65               | 9.85              | 0.40               |
| 10                  | 30.81             | 2.04               | 27.32             | 2.93               | 23.53             | 1.76               | 17.33             | 3.00               | 14.31             | 1.27               |
| 15                  | 34.99             | 2.30               | 30.91             | 4.02               | 28.69             | 1.54               | 19.50             | 2.94               | 16.09             | 1.40               |
| 20                  | 38.77             | 3.75               | 33.81             | 4.07               | 30.60             | 1.66               | 22.12             | 3.11               | 17.81             | 1.71               |
| 25                  | 42.16             | 4.32               | 37.41             | 4.55               | 33.73             | 1.85               | 23.93             | 3.02               | 19.41             | 2.34               |
| 30                  | 47.34             | 3.69               | 41.27             | 5.69               | 36.96             | 2.10               | 26.08             | 3.33               | 20.45             | 2.72               |
| 35                  | 51.30             | 4.72               | 45.97             | 6.65               | 40.37             | 2.27               | 28.47             | 3.97               | 21.99             | 3.26               |
| 40                  | 56.80             | 5.52               | 50.65             | 7.01               | 43.33             | 2.75               | 30.34             | 4.15               | 23.64             | 3.70               |
| Outer-ring channels |                   |                    |                   |                    |                   |                    |                   |                    |                   |                    |
| Flow rate           | 0.1 mL/hr         |                    | 0.25 mL/hr        |                    | 0.5 mL/hr         |                    | 0.75 mL/hr        |                    | 1 mL/hr           |                    |
| Volume              | Average Time(min) | Standard Deviation |
| 0                   | 11.82             | 0.20               | 8.86              | 0.27               | 7.32              | 0.16               | 6.53              | 0.20               | 5.51              | 0.20               |
| 5                   | 22.07             | 0.30               | 16.60             | 0.26               | 13.80             | 0.46               | 11.88             | 0.39               | 9.49              | 0.33               |
| 10                  | 27.13             | 0.63               | 20.34             | 1.47               | 17.67             | 0.44               | 13.84             | 0.46               | 11.05             | 1.42               |
| 15                  | 31.78             | 0.72               | 23.45             | 1.38               | 19.60             | 0.77               | 16.67             | 1.48               | 13.01             | 1.60               |
| 20                  | 36.19             | 1.22               | 26.77             | 1.37               | 22.21             | 1.26               | 19.03             | 1.80               | 14.58             | 2.26               |
| 25                  | 40.28             | 2.07               | 29.25             | 1.52               | 24.31             | 1.81               | 20.85             | 1.71               | 16.05             | 3.16               |
| 30                  | 44.23             | 2.32               | 32.05             | 2.04               | 26.13             | 1.82               | 22.36             | 1.52               | 17.35             | 4.00               |
| 35                  | 47.92             | 2.11               | 34.03             | 2.21               | 28.15             | 2.40               | 23.90             | 1.83               | 18.74             | 4.89               |
| 40                  | 52.35             | 2.55               | 38.00             | 3.32               | 30.37             | 2.85               | 25.57             | 2.22               | 20.04             | 5.75               |

(Volume equal 0 in the table indicated the time consumption of the reaction solution flowing from the inlet to the outlet in the microchannel)

**Table.S3** The relationship between the flow rates and the fluorescence intensity of *P.g*(169 bp), *T.d* (311 bp), *T.f* (226 bp) and *E. coli* (544 bp)

| <i>P.g</i> ( 169 bp ) | Flow rate | Fluorescence intensity |                    | <i>T.d</i> ( 311 bp )    | Flow rate | Fluorescence intensity |                    |
|-----------------------|-----------|------------------------|--------------------|--------------------------|-----------|------------------------|--------------------|
|                       |           | Mean                   | Standard Deviation |                          |           | Mean                   | Standard Deviation |
|                       | 0.10      | 116.50                 | 5.86               |                          | 0.10      | 111.18                 | 5.99               |
|                       | 0.25      | 26.63                  | 1.48               |                          | 0.25      | 22.26                  | 3.29               |
|                       | 0.50      | 10.49                  | 2.56               |                          | 0.50      | 12.96                  | 3.55               |
|                       | 0.75      | 5.51                   | 0.96               |                          | 0.75      | 10.30                  | 2.43               |
|                       | 1.00      | 4.15                   | 1.04               |                          | 1.00      | 7.55                   | 2.04               |
| <i>T.f</i> ( 226 bp ) | Flow rate | Fluorescence intensity |                    | <i>E.coli</i> ( 544 bp ) | Flow rate | Fluorescence intensity |                    |
|                       |           | Mean                   | Standard Deviation |                          |           | Mean                   | Standard Deviation |
|                       | 0.10      | 89.89                  | 4.59               |                          | 0.10      | 66.90                  | 7.03               |
|                       | 0.25      | 46.44                  | 4.63               |                          | 0.25      | 17.57                  | 4.04               |
|                       | 0.50      | 36.79                  | 2.70               |                          | 0.50      | 11.56                  | 2.97               |
|                       | 0.75      | 21.30                  | 3.45               |                          | 0.75      | 9.77                   | 1.30               |
|                       | 1.00      | 7.76                   | 2.83               |                          | 1.00      | 6.68                   | 1.37               |

## Reference

1. Z. Li, R. Ju, S. Sekine, D. Zhang, S. Zhuang and Y. Yamaguchi, *Lab on a Chip*, 2019, **19**, 2663-2668.
2. Z. Li, J. Liu, P. Wang, C. Tao, L. Zheng, S. Sekine, S. Zhuang, D. Zhang and Y. Yamaguchi, *Lab on a Chip*, 2021, **21**, 3159-3164.
3. J. Shimomura-Kuroki, K. Yamashita and S. Shimooka, *Odontology*, 2009, **97**, 32-37.
4. K. Boutaga, A. J. van Winkelhoff, C. M. Vandenbroucke-Grauls and P. H. Savelkoul, *J Clin Microbiol*, 2003, **41**, 4950-4954.
5. L.-F. Zhuang, R. M. Watt, N. Mattheos, M.-S. Si, H.-C. Lai and N. P. Lang, *Clinical Oral Implants Research*, 2016, **27**, 13-21.
6. M. C. Sánchez, A. Llama-Palacios, E. Fernández, E. Figuro, M. J. Marín, R. León, V. Blanc, D. Herrera and M. Sanz, *Dental Materials*, 2014, **30**, 1161-1171.
7. A. Yoshida, M. Kawada, N. Suzuki, Y. Nakano, T. Oho, T. Saito and Y. Yamashita, *Oral Microbiology and Immunology*, 2004, **19**, 196-200.
8. N. Suzuki, A. Yoshida, T. Saito, M. Kawada and Y. Nakano, *J Clin Microbiol*, 2004, **42**, 2255-2257.
9. S. M. Ozbek and A. Ozbek, *Oral Surgery, Oral Medicine, Oral Pathology, Oral Radiology, and Endodontology*, 2010, **110**, 670-674.
10. K. Nagaoka, K. Yanagihara, Y. Harada, K. Yamada, Y. Migiyama, Y. Morinaga, K. Izumikawa and S. Kohno, *Journal of Infection and Chemotherapy*, 2017, **23**, 69-73.
11. Z. Li, D. Li, D. Zhang and Y. Yamaguchi, *Analyst*, 2014, **139**, 6113-6117.
